# Supplementary material
Source: Springer Nature journal article supplement (https://www.springermedizin.de/resource/supplementary/12937_2012_534_MOESM1_ESM.pdf/25653510)
Supplement: MOESM1 [file 25653510]

**Supplementary file 1**

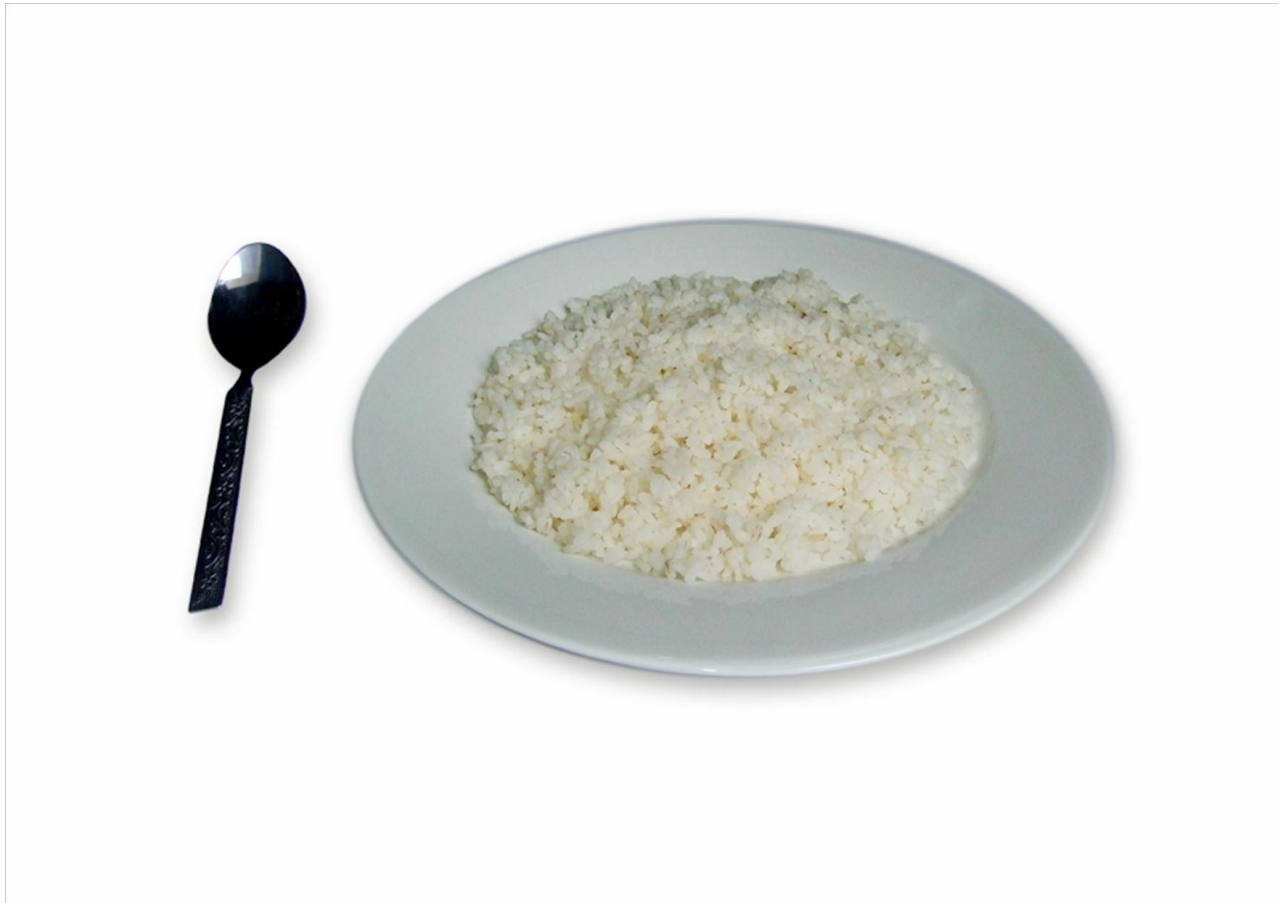

**Figure 1:** Example of a food photograph (200gms of rice)
